# Supplementary material for: Deciphering the Endophytic and Rhizospheric Microbial Communities of a Metallophyte Commelina communis in Different Cu-Polluted Soils
Source: MDPI journal article supplement (doi:10.3390/microorganisms9081689), 2021-08-09
Supplement: s1 [file s1]

## Supplementary Materials

# Deciphering the Endophytic and Rhizospheric Microbial Communities of a Metallophyte *Commelina communis* in Different Cu-Polluted Soils

Li He <sup>1,2,†</sup>, Yanzhen Ren <sup>1,2,†</sup>, Weimin Zeng <sup>1,2</sup>, Xueling Wu <sup>1,2</sup>, Li Shen <sup>1,2</sup>, Runlan Yu <sup>1,2</sup>, Yuandong Liu <sup>1,2</sup> and Jiaokun Li <sup>1,\*</sup>

<sup>1</sup> School of Minerals Processing and Bioengineering, Central South University, Changsha 410083, China; 195612132@csu.edu.cn (L.H.); 185612135@csu.edu.cn (Y.R.); zengweimin1024@126.com (W.Z.); wxlcsu@csu.edu.cn (X.W.); lishen@csu.edu.cn (L.S.); yrl715@sina.com (R.Y.); ydoliu@sina.cn (Y.L.)

<sup>2</sup> Key Laboratory of Biometallurgy, Ministry of Education, Central South University (CSU), Changsha 410083, China

\* Correspondence: lijiaokun@csu.edu.cn

† These authors contributed equally to the work.

**Table S1.** Physicochemical properties of rhizosphere soil samples from the *C. communis* used in this study.

| Sample | pH           | OM (g/kg)     | TN (g/kg)    | TP (g/kg)     | TK (g/kg)    | EC (μS/cm)      | Mg (mg/kg)      | Ca (mg/kg)       | Cu (mg/kg)      |
|--------|--------------|---------------|--------------|---------------|--------------|-----------------|-----------------|------------------|-----------------|
| CS     | 6.26 ± 0.16a | 11.52 ± 0.98a | 0.84 ± 0.12a | 1.55 ± 0.22a  | 16.7 ± 1.11a | 70.96 ± 3.06a   | 324.33 ± 25.03a | 1065.28 ± 15.02a | 25 ± 3.15a      |
| LY     | 7.37 ± 0.37b | 3.24 ± 0.10b  | 0.23 ± 0.04b | 1.35 ± 0.15ab | 19.5 ± 1.32b | 467.67 ± 27.23b | 507.34 ± 20.03b | 1211 ± 62.34a    | 41 ± 3.61b      |
| ZZ     | 8.31 ± 0.15c | 3.93 ± 0.72b  | 0.20 ± 0.03b | 1.13 ± 0.14b  | 12.1 ± 0.51c | 952 ± 30.12c    | 22100 ± 24.25c  | 26700 ± 182.81b  | 248 ± 28.91c    |
| DY     | 8.16 ± 0.05c | 16.7 ± 0.72c  | 1.23 ± 0.08c | 0.74 ± 0.07c  | 13.7 ± 0.41c | 278 ± 10.01d    | 17500 ± 25.89d  | 7900 ± 25.63c    | 13100 ± 132.28d |

OM, organic matter; TC, total carbon; TN, total nitrogen; TP, total phosphorus; TK, total potassium; EC, electrical conductivity; The values represent means ± standard deviation (n = 3); Different small letters in a single column represent significant difference ( $p < 0.05$ ).

**Table S2** Summary of sequences obtained for the endosphere and rhizosphere of *C. communis*.

|             | Endosphere       |              |                |            |          | Rhizosphere      |              |                |            |          |
|-------------|------------------|--------------|----------------|------------|----------|------------------|--------------|----------------|------------|----------|
|             | No. of sequences | No. of bases | Average length | No. of OTU | Coverage | No. of sequences | No. of bases | Average length | No. of OTU | Coverage |
| <b>CS_1</b> | 60,812           | 22,833,330   | 375.47         | 458        | 99.88%   | 20,903           | 7,877,314    | 376.85         | 835        | 97.54%   |
| <b>CS_2</b> | 69,981           | 26,239,549   | 374.95         | 550        | 99.92%   | 24,993           | 9,416,729    | 376.77         | 946        | 97.19%   |
| <b>CS_3</b> | 65,373           | 24,562,782   | 375.47         | 686        | 99.62%   | 21,804           | 8,219,445    | 376.96         | 819        | 96.45%   |
| <b>LY_1</b> | 72,794           | 27,313,140   | 375.21         | 413        | 99.88%   | 24,402           | 9,146,945    | 374.84         | 641        | 98.83%   |
| <b>LY_2</b> | 74,207           | 27,811,044   | 374.78         | 567        | 99.87%   | 22,727           | 8,537,262    | 375.64         | 708        | 98.34%   |
| <b>LY_3</b> | 74,972           | 28,029,837   | 373.87         | 497        | 99.82%   | 20,841           | 7,832,972    | 375.84         | 765        | 98.00%   |
| <b>ZZ_1</b> | 69,476           | 26,072,764   | 375.28         | 760        | 99.80%   | 23,698           | 8,916,425    | 376.25         | 1085       | 96.92%   |
| <b>ZZ_2</b> | 68,034           | 25,438,611   | 373.91         | 562        | 99.79%   | 24,025           | 9,038,907    | 376.23         | 1086       | 96.28%   |
| <b>ZZ_3</b> | 66,999           | 25,112,162   | 374.81         | 656        | 99.82%   | 20,817           | 7,827,262    | 376.01         | 1060       | 96.25%   |
| <b>DY_1</b> | 23,271           | 8,746,496    | 375.85         | 167        | 99.98%   | 22,840           | 8,559,128    | 374.74         | 402        | 99.08%   |
| <b>DY_2</b> | 24,774           | 9,345,940    | 377.25         | 151        | 99.70%   | 18,987           | 7,108,758    | 374.40         | 402        | 99.01%   |
| <b>DY_3</b> | 18,966           | 7,148,983    | 376.94         | 45         | 99.91%   | 17,858           | 6,682,173    | 374.18         | 417        | 99.15%   |

**Table S3** Pearson moment correlation analyses of environmental factors and bacterial diversity and abundance of endosphere and rhizosphere of *C. communis*. \* and \*\* indicate significant differences at  $p < 0.05$  and  $0.01$ , respectively.

| Environmental factors | Pearson correlation coefficient |               |            |             |               |            |
|-----------------------|---------------------------------|---------------|------------|-------------|---------------|------------|
|                       | Endosphere                      |               |            | Rhizosphere |               |            |
|                       | No. of OTUs                     | Shannon index | Chao index | No. of OTUs | Shannon index | Chao index |
| <b>pH</b>             | -0.237                          | -0.232        | -0.302     | -0.098      | -0.346        | -0.088     |
| <b>OM</b>             | -0.708*                         | -0.645*       | -0.731*    | -0.674*     | -0.500        | -0.640*    |
| <b>TN</b>             | -0.707*                         | -0.678*       | -0.741*    | -0.659*     | -0.483        | -0.626*    |
| <b>TP</b>             | 0.630*                          | 0.551         | 0.692*     | 0.523       | 0.642*        | 0.508      |
| <b>TK</b>             | 0.159                           | 0.093         | 0.221      | -0.134      | -0.020        | -0.175     |
| <b>EC</b>             | 0.417                           | 0.343         | 0.389      | 0.554       | 0.282         | 0.553      |
| <b>Mg</b>             | -0.171                          | -0.175        | -0.241     | 0.069       | -0.130        | 0.105      |
| <b>Ca</b>             | 0.308                           | 0.250         | 0.250      | 0.536       | 0.312         | 0.561      |
| <b>Cu</b>             | -0.896**                        | -0.801**      | -0.935**   | -0.824**    | -0.825**      | -0.797**   |

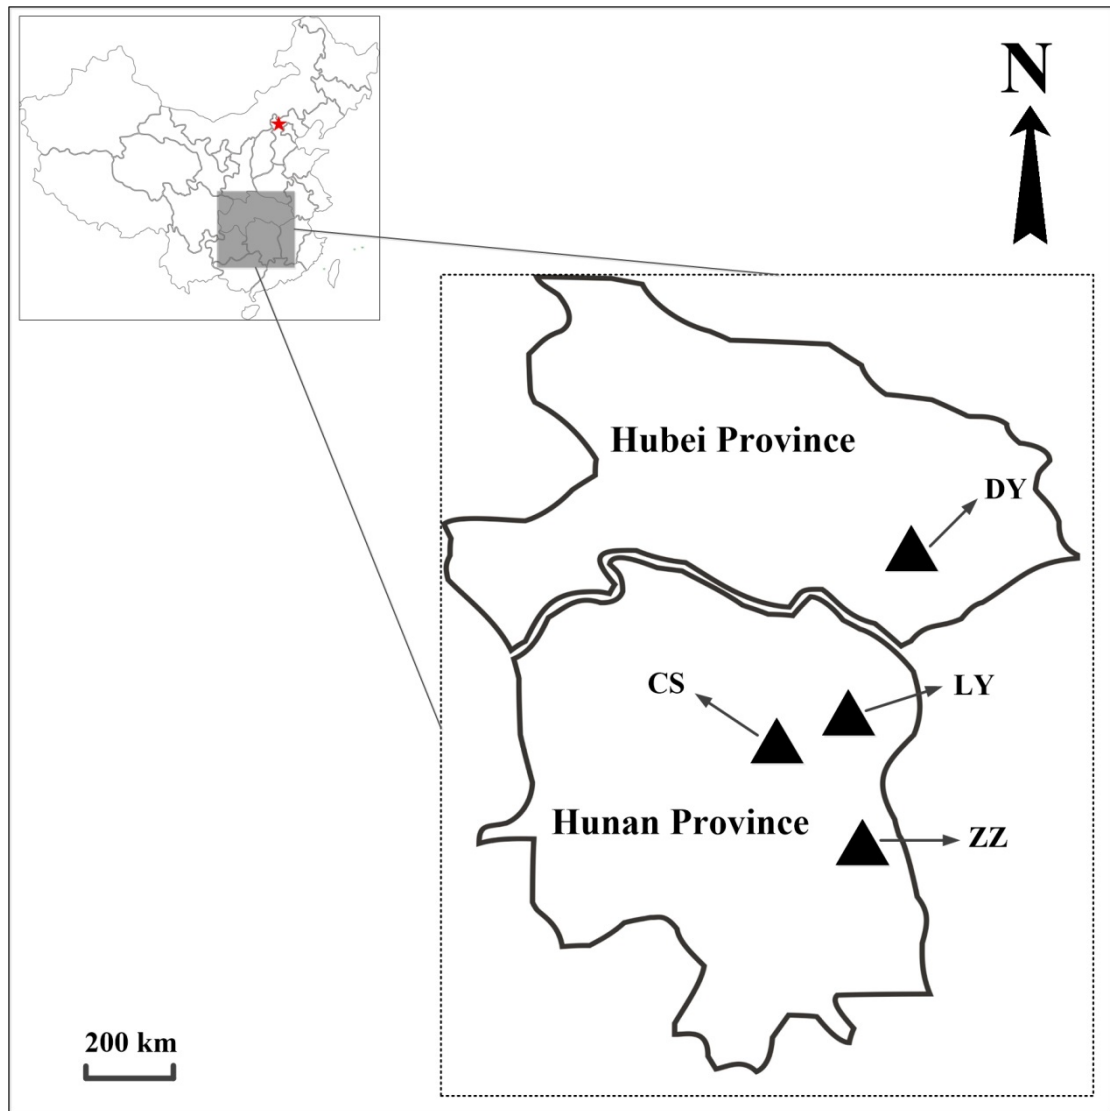

**Figure S1.** Locations of all sampling sites for *C. communis* in this study.

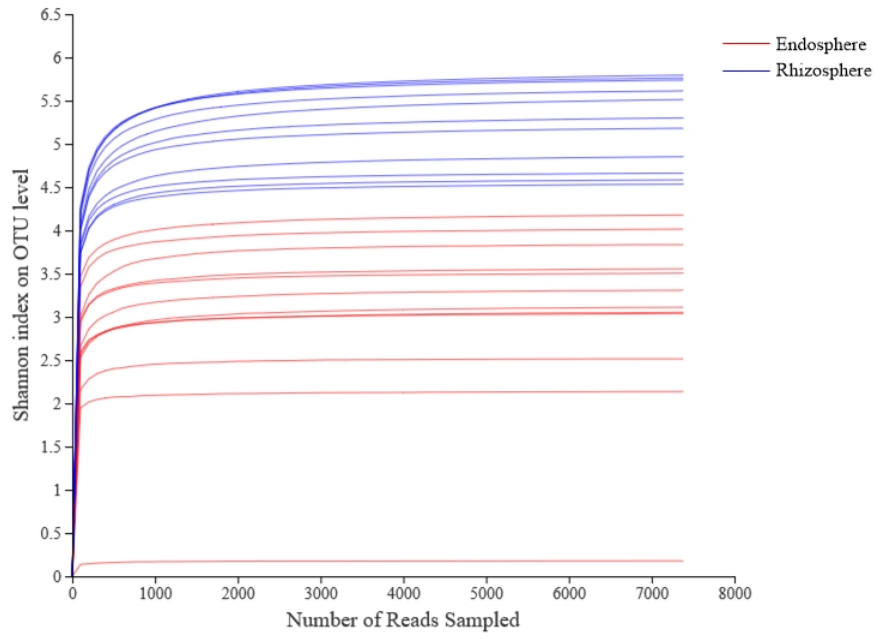

**Figure S2.** The rarefaction curve analysis of the bacterial sequences. The curves were constructed using the Shannon index values of the OTUs and the number of reads.

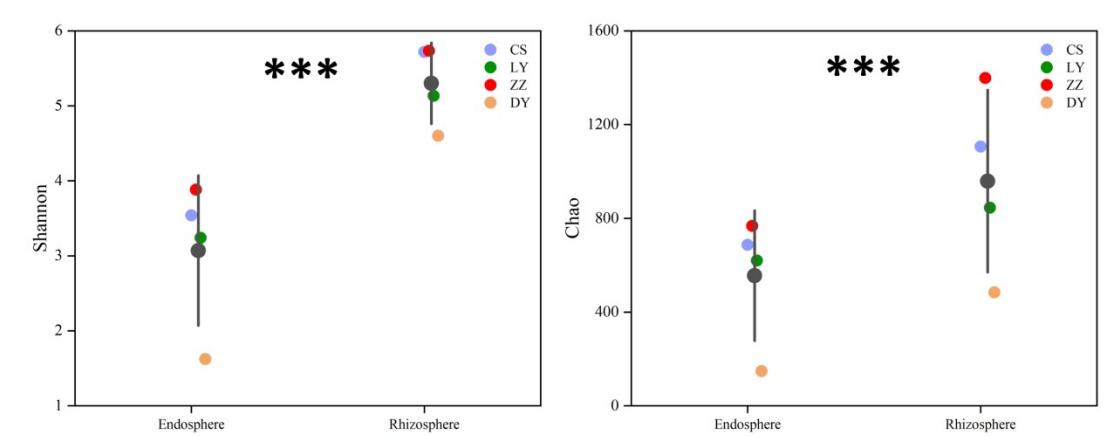

**Figure S3.** The values of alpha diversity indexes (Shannon and Chao) in endosphere and rhizosphere microbial populations of *C. communis* at the four sampling sites (colorful dots) and their corresponding endosphere and rhizosphere means and 95% confidence intervals (solid black dots and vertical error bars, respectively). The significance levels of the difference between endosphere and rhizosphere means for each alpha metric resulting from ANOVA tests. \*\*\* indicates significant differences at  $p < 0.001$ .

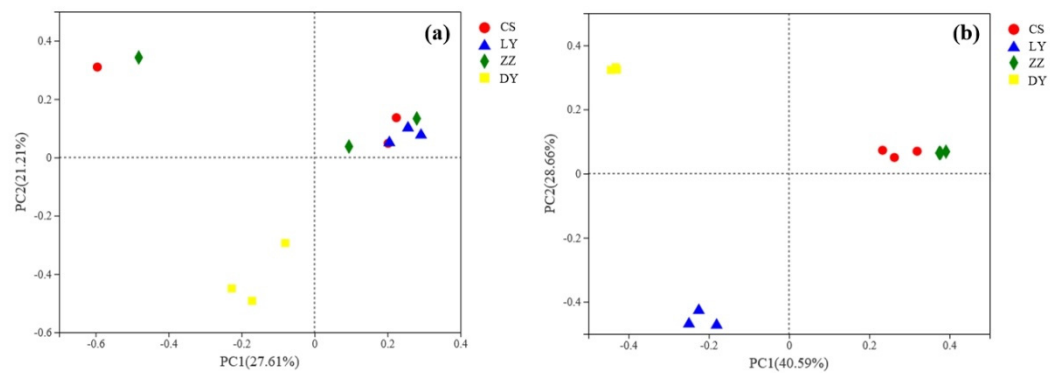

**Figure S4.** Principal coordinate analysis (PCoA) of bacterial communities in the endosphere (a) and rhizosphere (b) of *C. communis* at the four sampling sites.



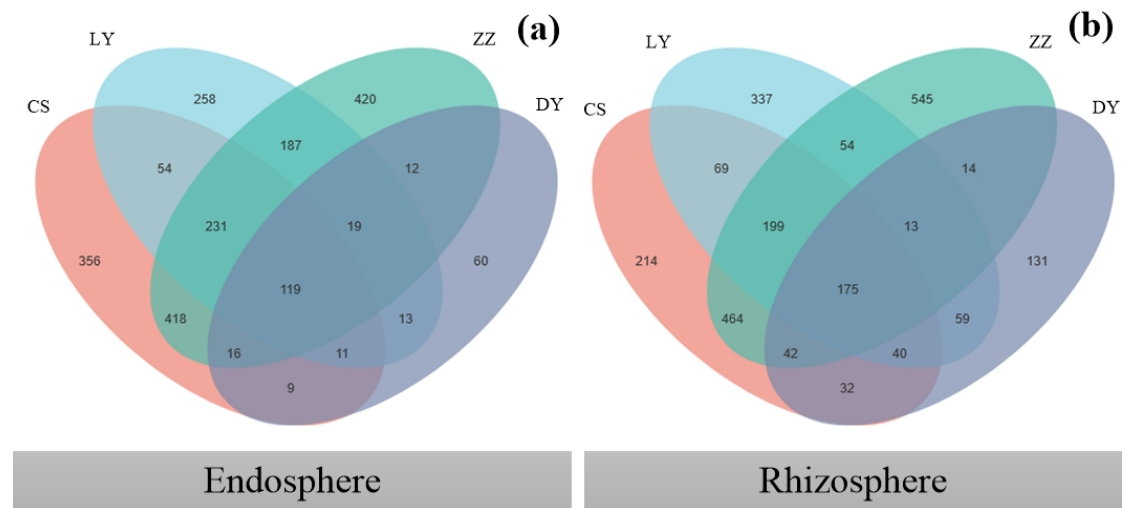

**Figure S5.** Venn diagrams of shared OTUs in endosphere (a) and rhizosphere (b) of *C. communis* plants among the four sampling locations.

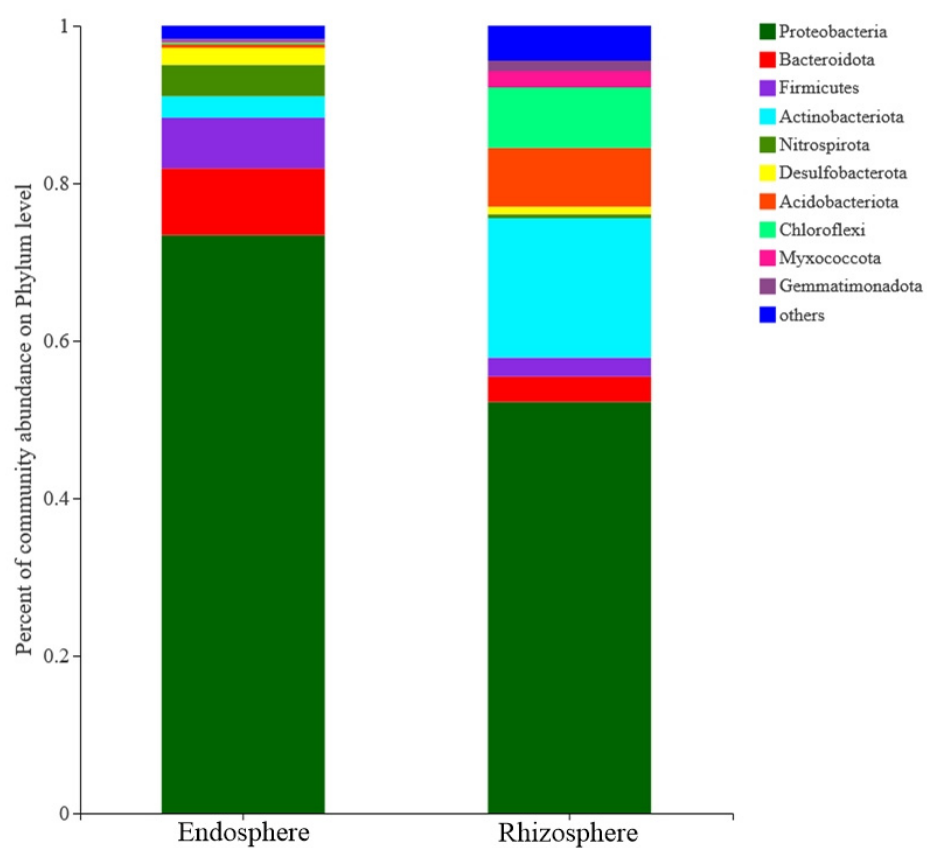

**Figure S6.** Bacterial community composition at the phylum level in the endosphere and rhizosphere of *C. communis*.

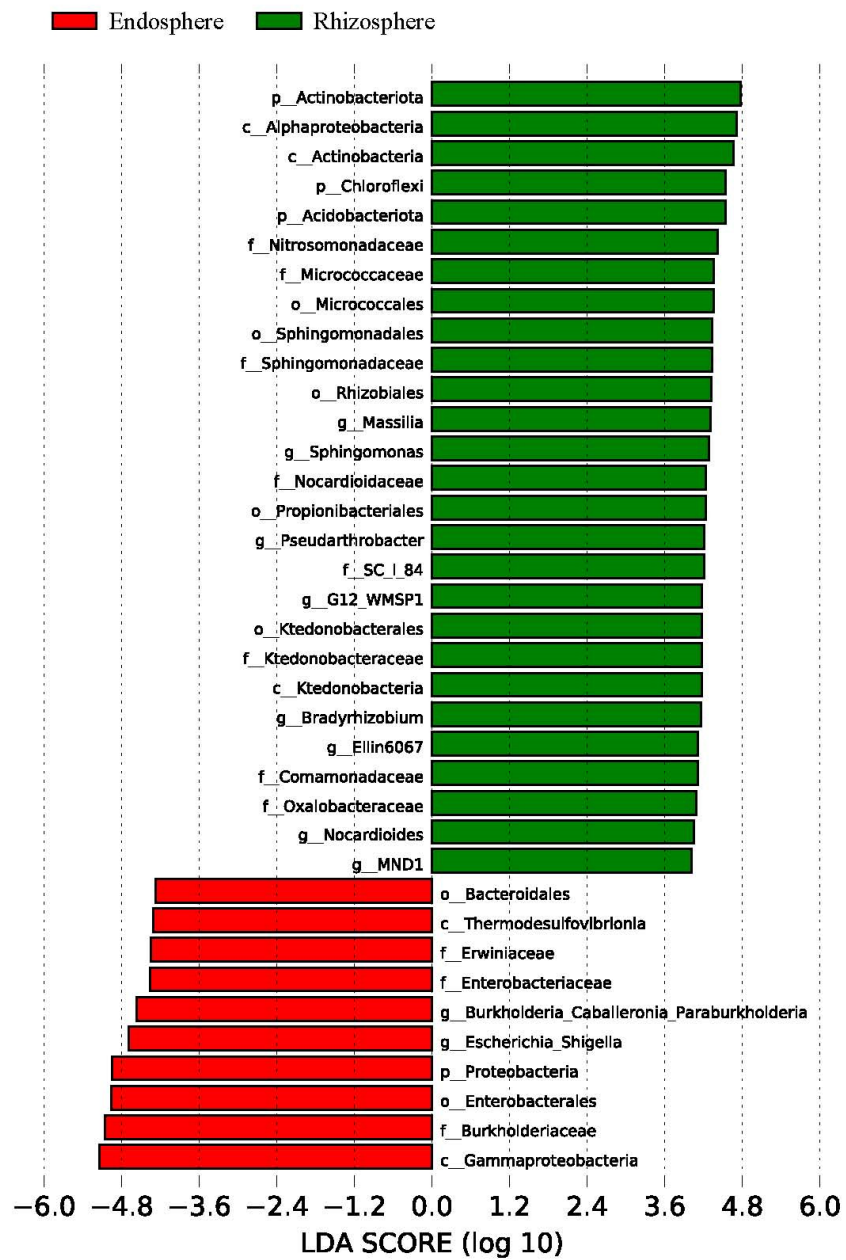

**Figure S7.** Enriched taxa of the bacterial communities reaching a linear discriminant analysis (LDA) significance threshold of 4.0.
